# Supplementary material for: Association with PAK2 Enables Functional Interactions of Lentiviral Nef Proteins with the Exocyst Complex
Source: PubMed Central journal article supplement — mBio. 2015 Sep 8;6(5):e01309-15. doi: 10.1128/mBio.01309-15 (PMC4600113; doi:10.1128/mbio.01309-15), 2015-09-08
Supplement: mbo004152450sf1.pdf [file mbo004152450sf1.pdf]

**A**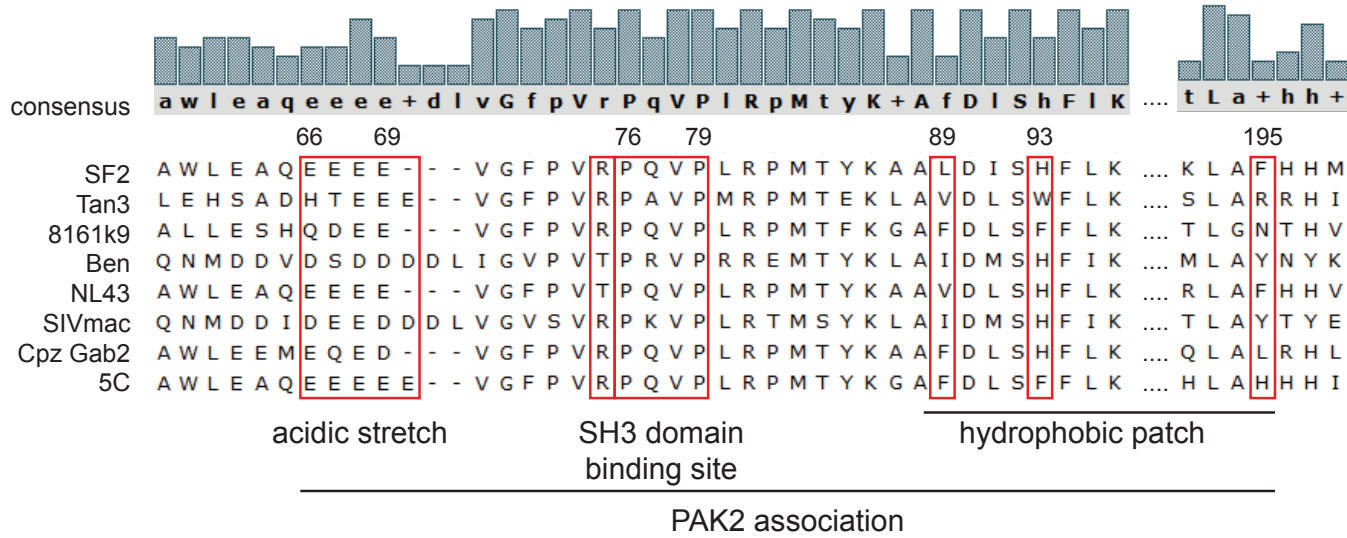**B**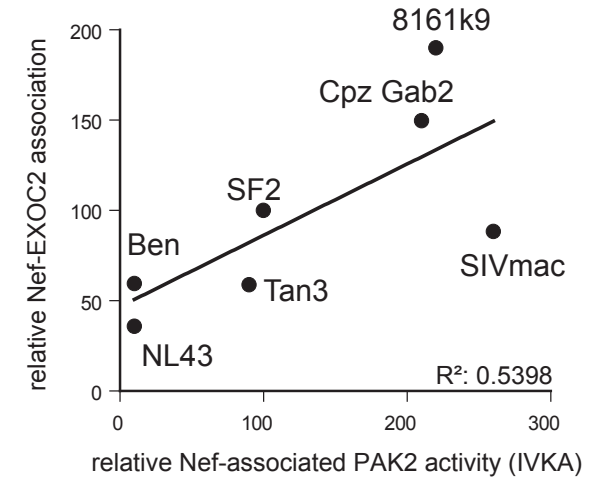**C**

|                       | SF2 | Tan3 | 8161k9 | Ben | NL43 | SIVmac | Cpz Gab2 | SF2 G2A | SF2E4A4 | SF2AxxA | SF2F195A | Ref           |
|-----------------------|-----|------|--------|-----|------|--------|----------|---------|---------|---------|----------|---------------|
| EXOC                  | ++  | +    | +++    | +   | +    | ++     | +++      | +       | -       | -       | -        | this study    |
| PAK2                  | ++  | ++   | +++    | +/- | +/-  | +++    | +++      | -       | +       | -       | -        | 9, 10, 11, 13 |
| Ruffle inhibition     | ++  | -    | ++     | ++  | ++   | ++     | ++       | -       | -       | -       | -        | 9, 12         |
| pCofilin induction    | ++  | -    | ++     | ++  | ++   | ++     | ++       | nd      | nd      | -       | -        | 9, 12         |
| Actin Ring inhibition | ++  | -    | ++     | ++  | ++   | +++    | ++       | -       | +       | -       | -        | 2, 11         |
| pTyrosin inhibition   | ++  | -    | ++     | ++  | ++   | ++     | ++       | nd      | nd      | -       | -        | 2, 11         |
