# Supplementary figures and images for: Association with PAK2 Enables Functional Interactions of Lentiviral Nef Proteins with the Exocyst Complex
Source: PubMed Central journal article supplement — mBio. 2015 Sep 8;6(5):e01309-15. doi: 10.1128/mBio.01309-15 (PMC4600113; doi:10.1128/mbio.01309-15), 2015-09-08

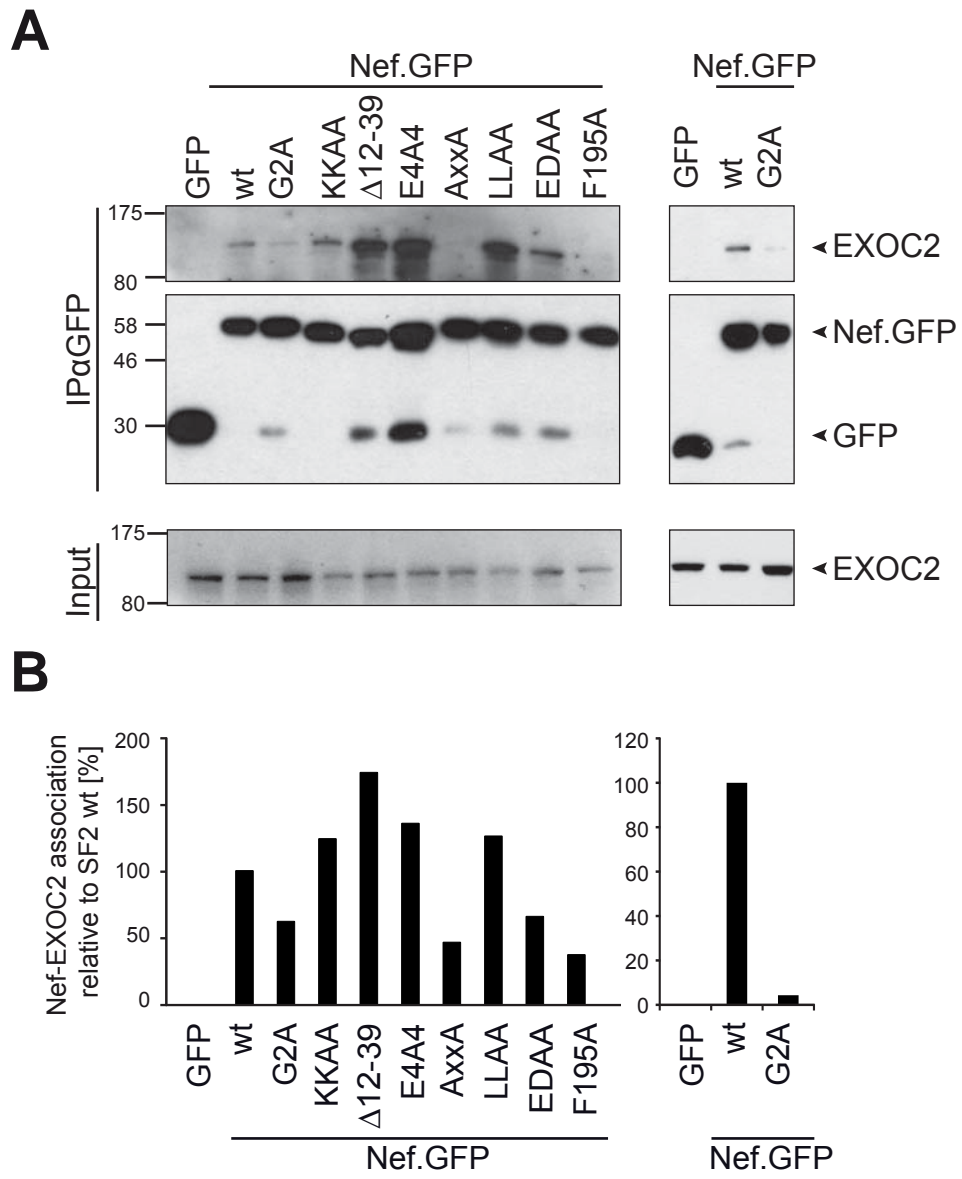

Fig. S2

Supplement: mbo004152450sf2.pdf [file mbo004152450sf2.pdf]

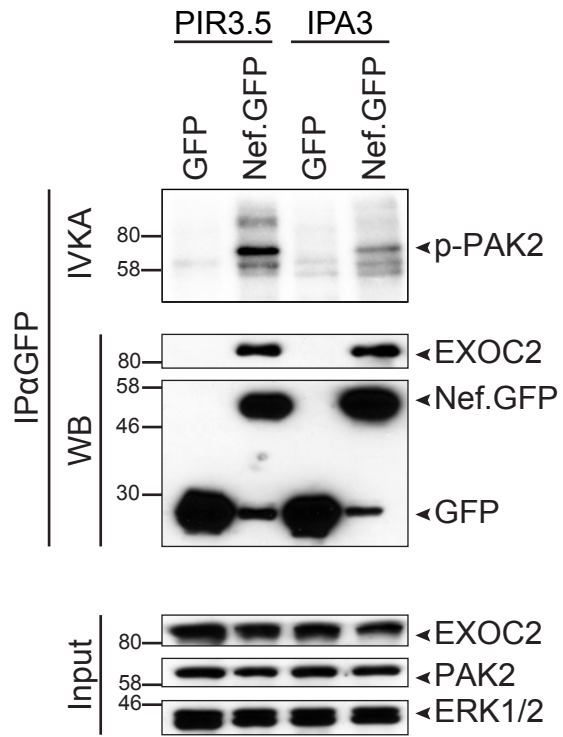

Supp Fig 3 Imle et al

Supplement: mbo004152450sf3.pdf [file mbo004152450sf3.pdf]

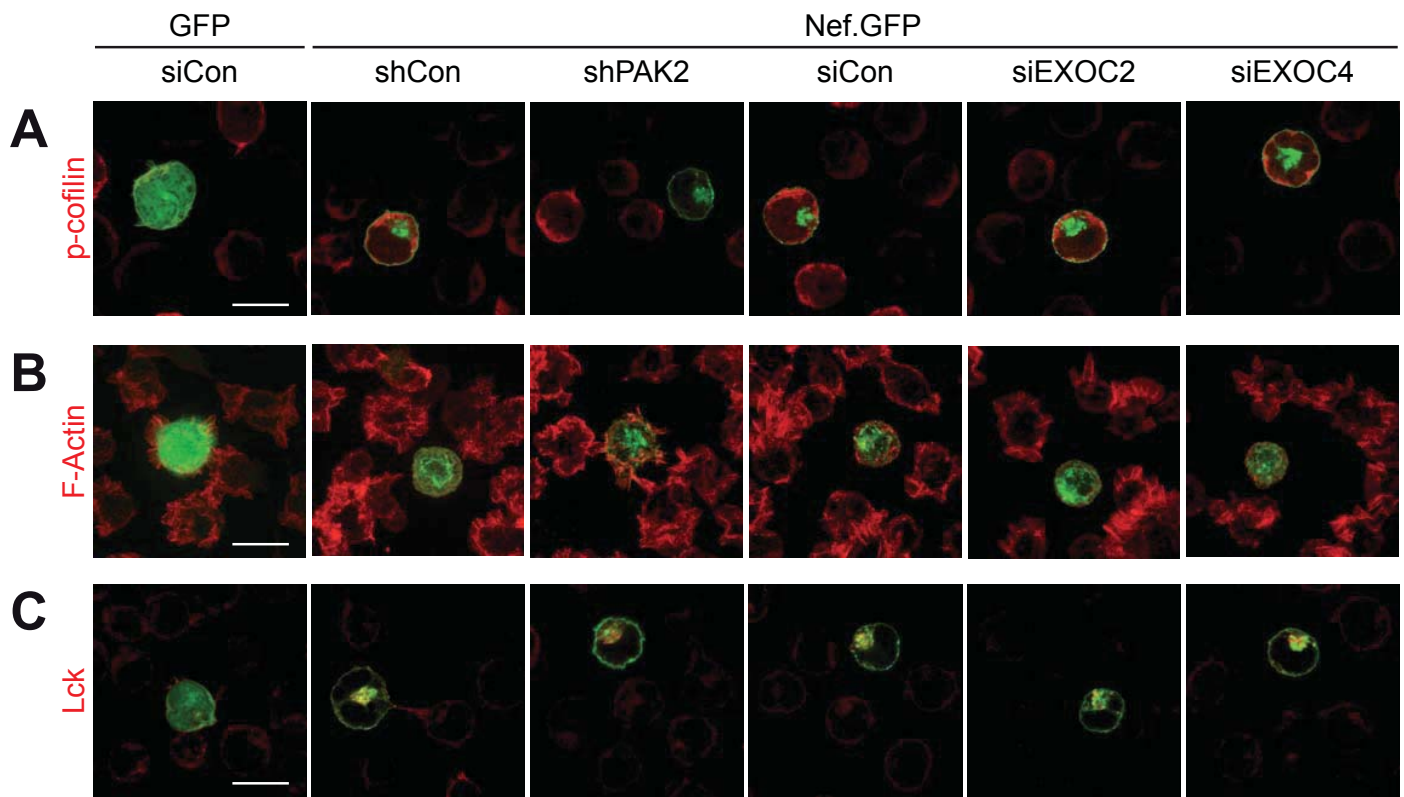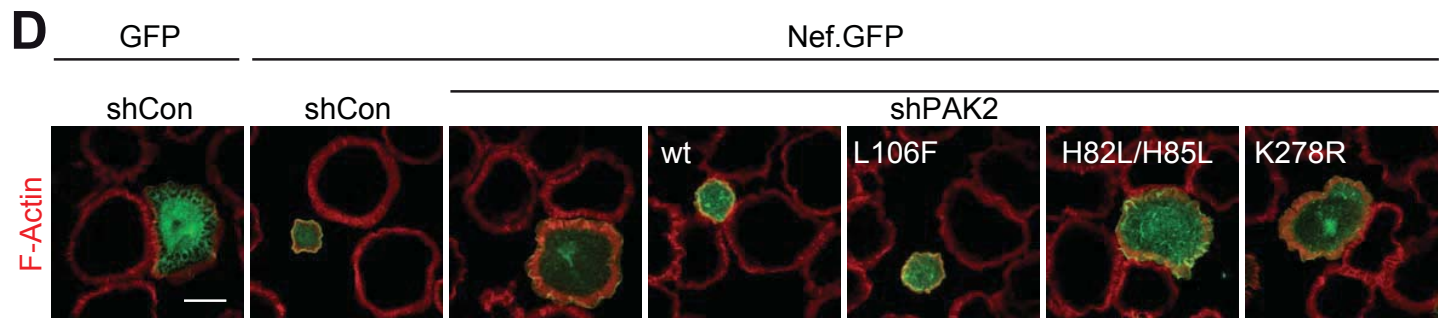

Suppl Fig S4

Supplement: mbo004152450sf4.pdf [file mbo004152450sf4.pdf]

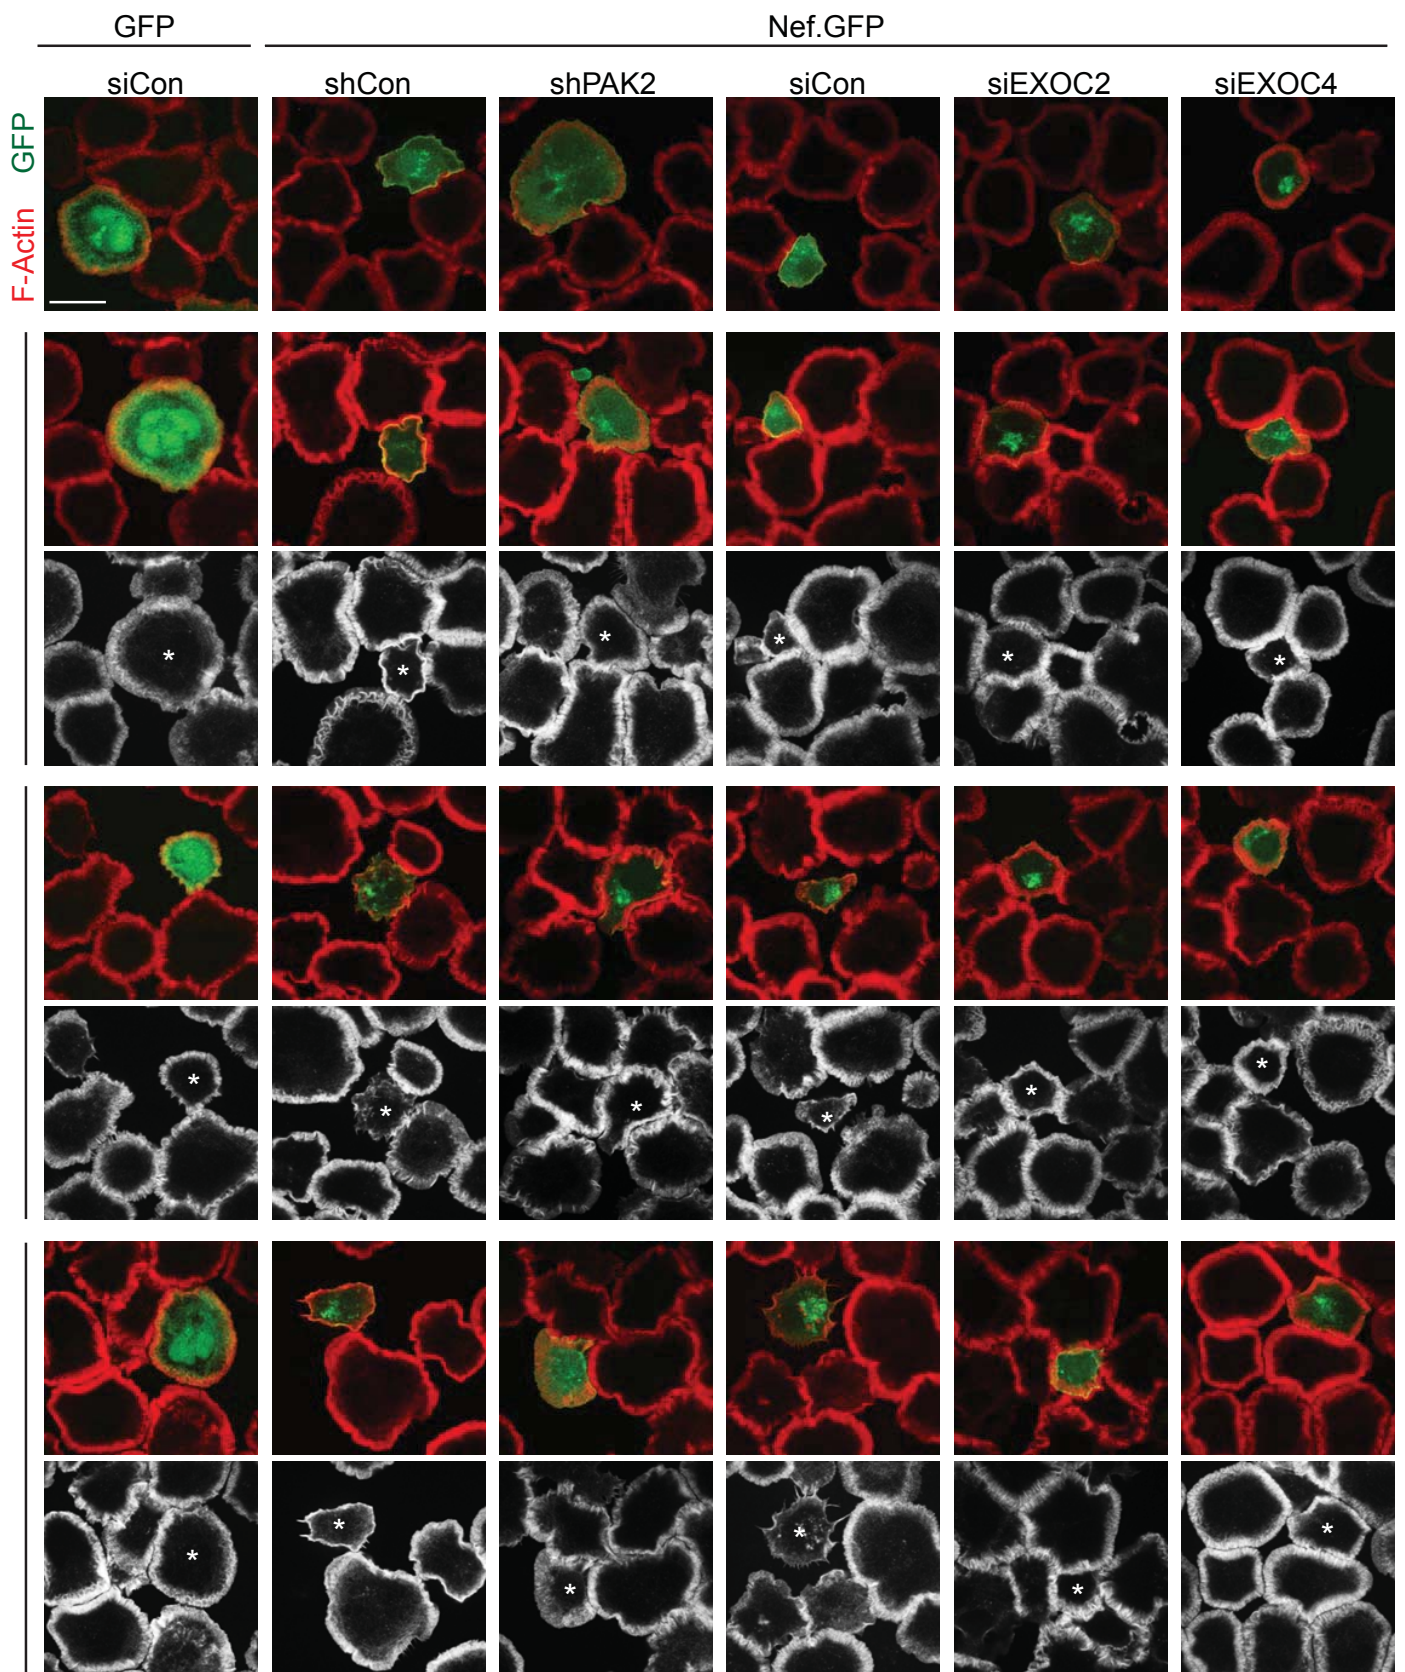

Suppl Fig S5

Supplement: mbo004152450sf5.pdf [file mbo004152450sf5.pdf]

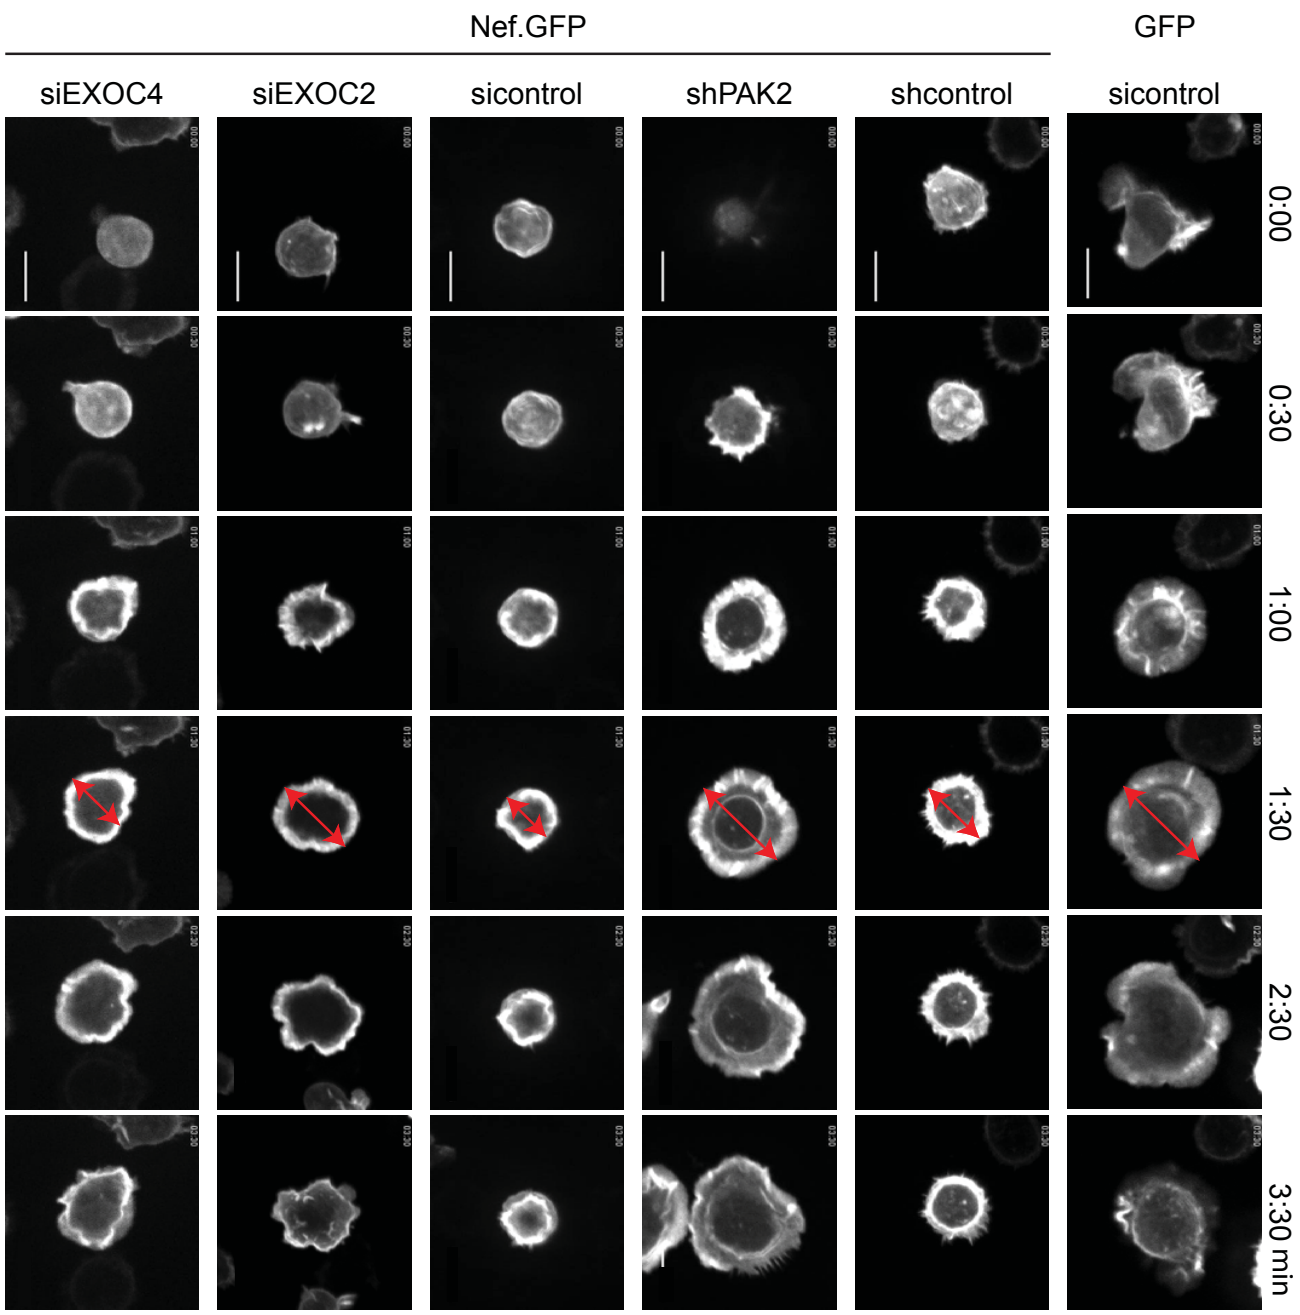

Suppl Fig S6

Supplement: mbo004152450sf6.pdf [file mbo004152450sf6.pdf]

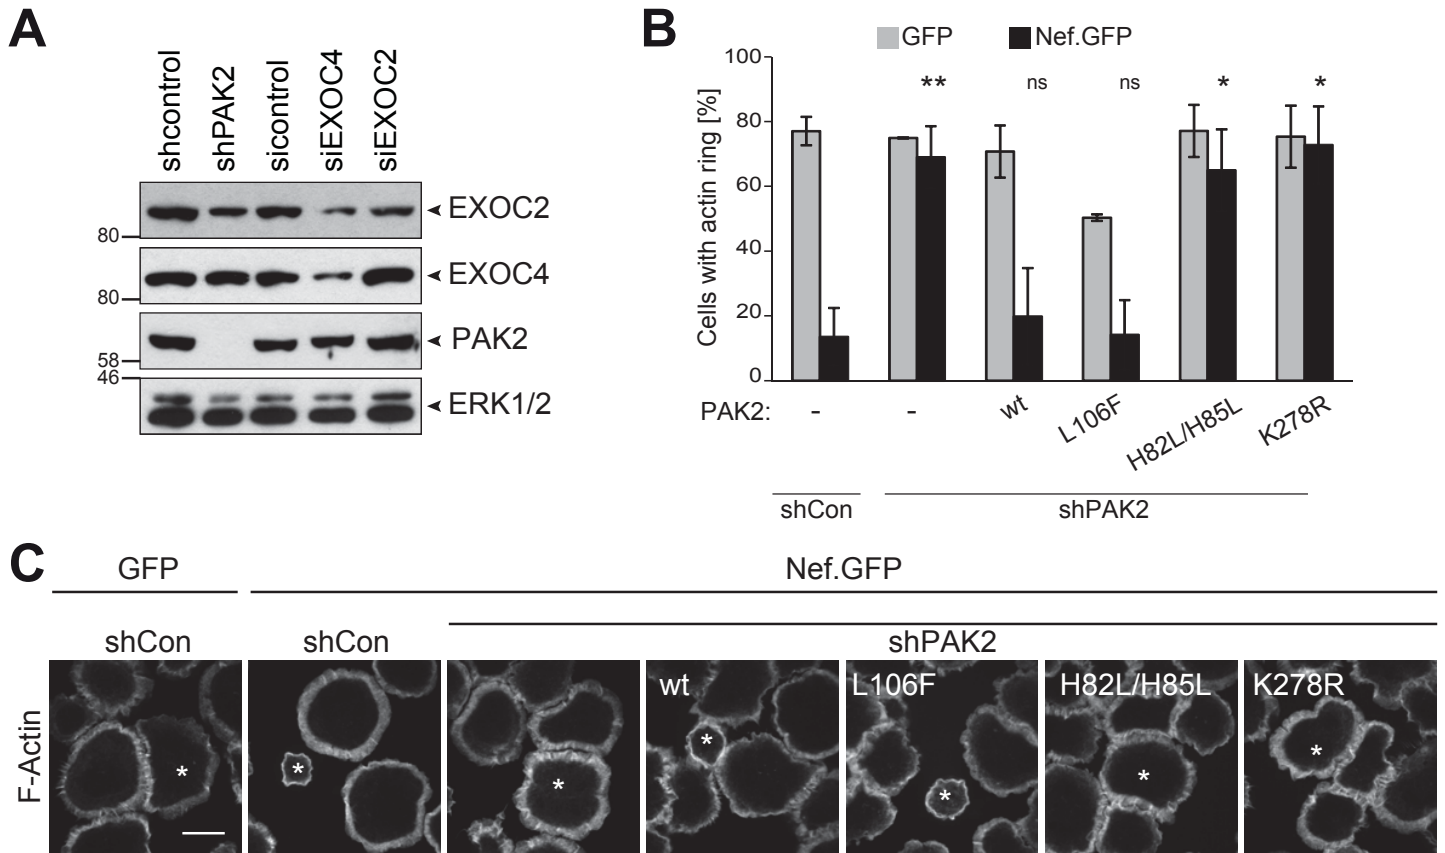

Fig. S7 Imle et al

Supplement: mbo004152450sf7.pdf [file mbo004152450sf7.pdf]

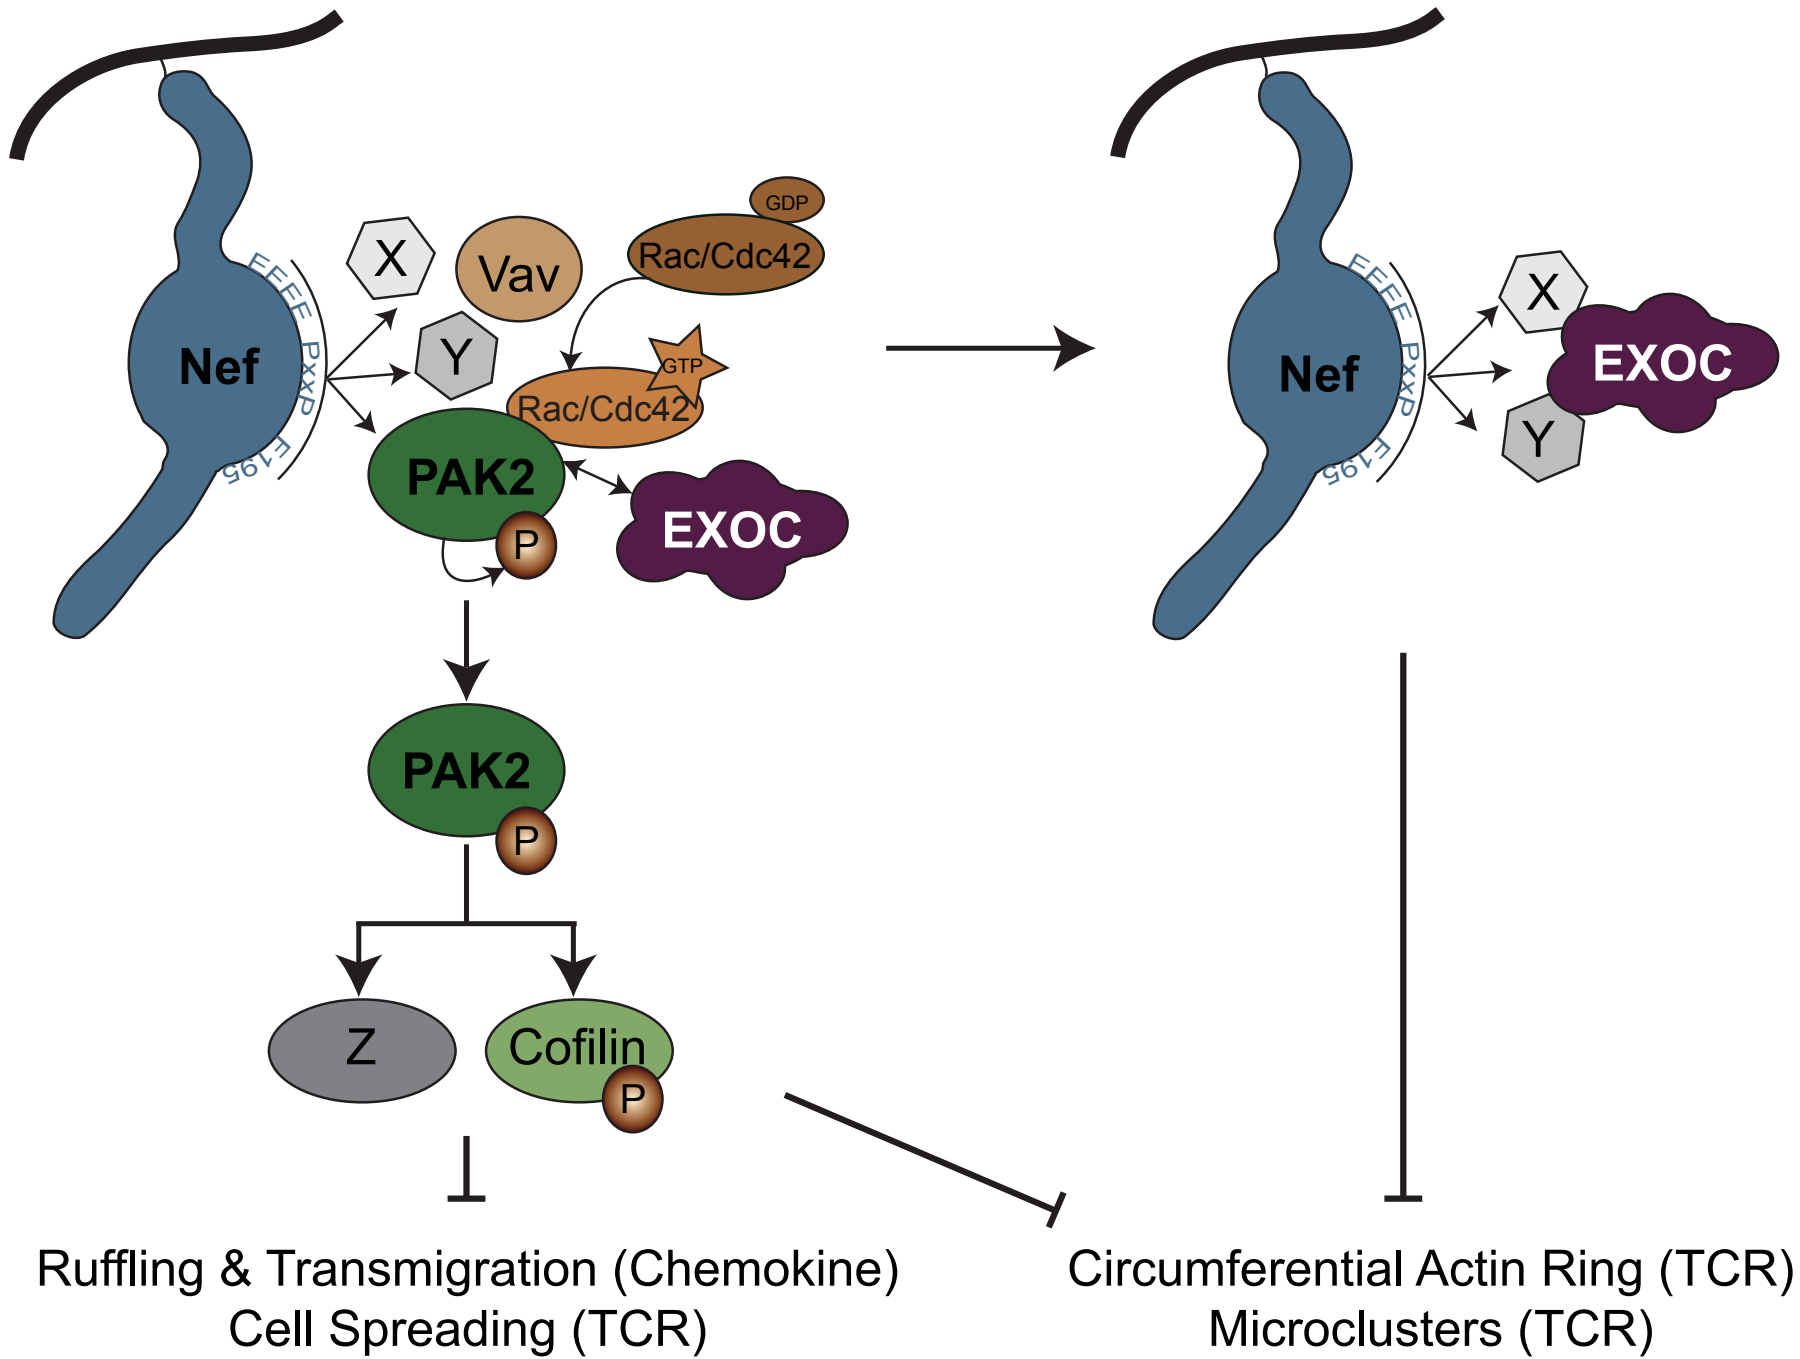

Supplement: mbo004152450sf8.pdf [file mbo004152450sf8.pdf]
